# Supplementary material for: Phosphotungstic acid heterogenized by assembly with pyridines for efficient catalytic conversion of fructose to methyl levulinate
Source: Royal Society of Chemistry journal article supplement (doi:10.1039/c8ra02278j), 2018-01-01
Supplement: c8ra02278j1.pdf [file c8ra02278j1.pdf]

## Electronic supplementary information

### Phosphotungstic acid heterogenized by assembly with pyridine for efficient catalytic conversion of fructose to methyl levulinate

Chengjiang Fang<sup>a</sup>, Yan Li<sup>a</sup>, Wenfeng Zhao<sup>a</sup>, Weibo Wu<sup>a</sup>, Hu Li<sup>a\*</sup>, Chao He<sup>b</sup>, Song Yang<sup>a\*</sup>

<sup>a</sup> *State Key Laboratory Breeding Base of Green Pesticide & Agricultural Bioengineering, Key Laboratory of Green Pesticide & Agricultural Bioengineering, Ministry of Education, State-Local Joint Laboratory for Comprehensive Utilization of Biomass, Center for Research & Development of Fine Chemicals, Guizhou University, Guiyang, Guizhou 550025, China*

<sup>b</sup> *School of Environmental Science and Engineering, Sun Yat-sen University, Guangzhou 510006, P. R. China*

\* Corresponding authors:

E-mail: jhzx.msm@gmail.com (SY); hli13@gzu.edu.cn (HL)

Tel.: +86(851)8829-2171. Fax: +86(851)8829-2170

#### Table of Contents:

**Fig. S1** Effect of reaction time on the synthesis of ML from fructose

**Fig. S2** TGA patterns of fresh and recycled 3-FPYPW catalysts after four cycles

**Fig. S3** MS spectrum of methyl levulinate

**Fig. S4** MS spectrum of 2-(dimethoxymethyl)-5-(methoxymethyl)furan

**Fig. S5** MS spectrum of 5-methoxymethylfurfural

**Fig. S6** MS spectrum of 5-(dimethoxymethyl)-2-furanmethanol

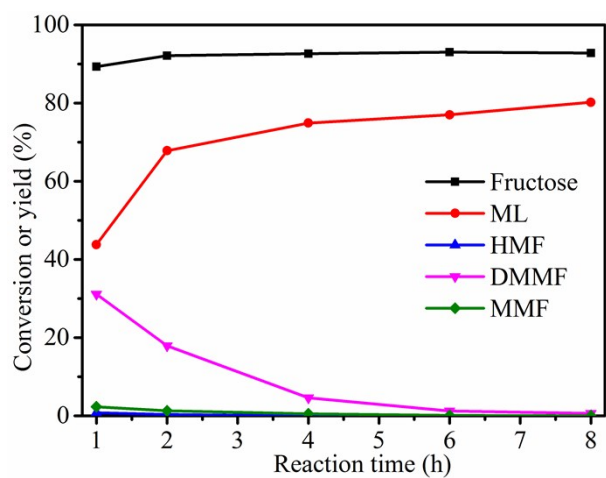

**Fig. S1** Effect of reaction time on the synthesis of ML from fructose. Reaction conditions: 0.2 mol/L fructose, 5 mL methanol, 3-FPYPW (0.1 mmol H<sup>+</sup>), and 140 °C.

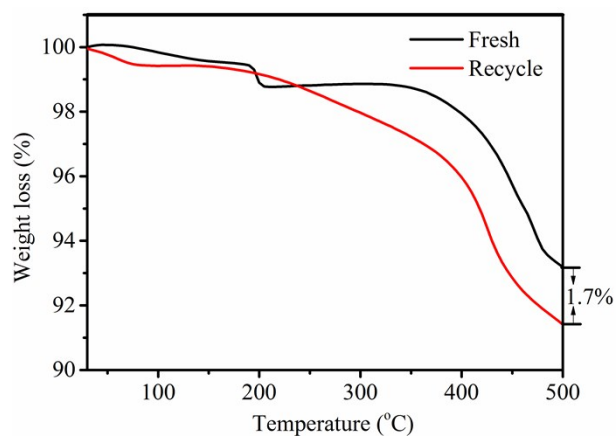

**Fig. S2** TGA patterns of fresh and recycled 3-FPYPW catalysts after four cycles

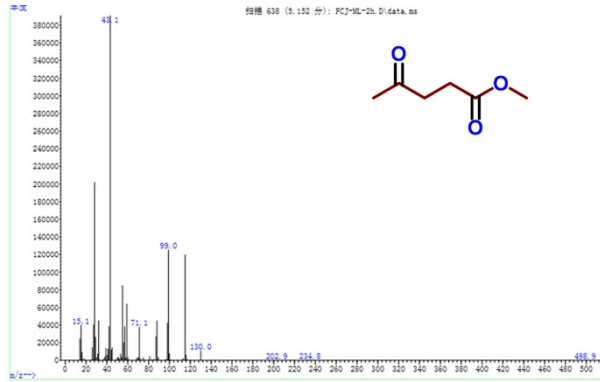

Fig. S3 MS spectrum of methyl levulinate

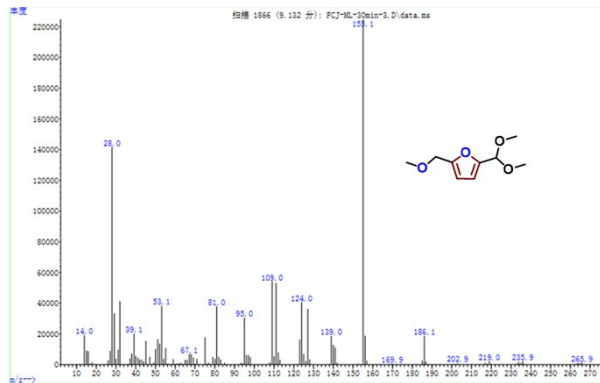

Fig. S4 MS spectrum of 2-(dimethoxymethyl)-5-(methoxymethyl)furan

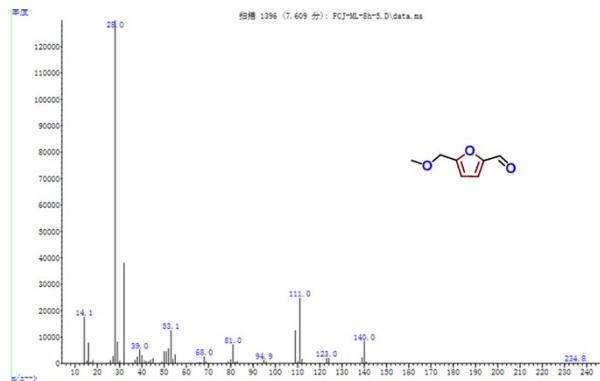

Fig. S5 MS spectrum of 5-methoxymethylfurfural

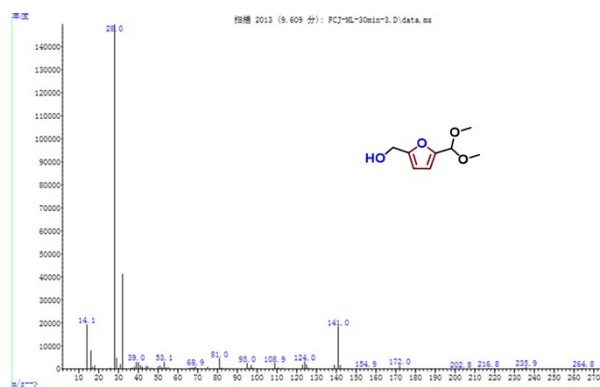

**Fig. S6** MS spectrum of 5-(dimethoxymethyl)-2-furanmethanol
